# Supplementary material
Source: bioRxiv or medRxiv preprint supplement (https://www.biorxiv.org/highwire/filestream/135240/field_highwire_adjunct_files/0/450197-1.pdf)
Supplement: Supplementary file [file 450197-1.pdf]

Statistically significant difference at the median

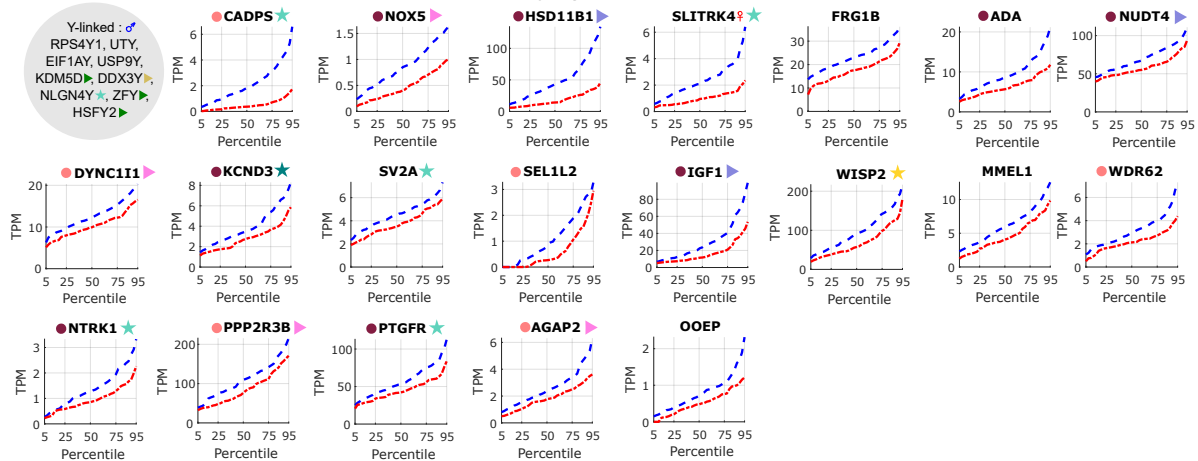

Statistically significant difference at the 75th percentile, but not at the median

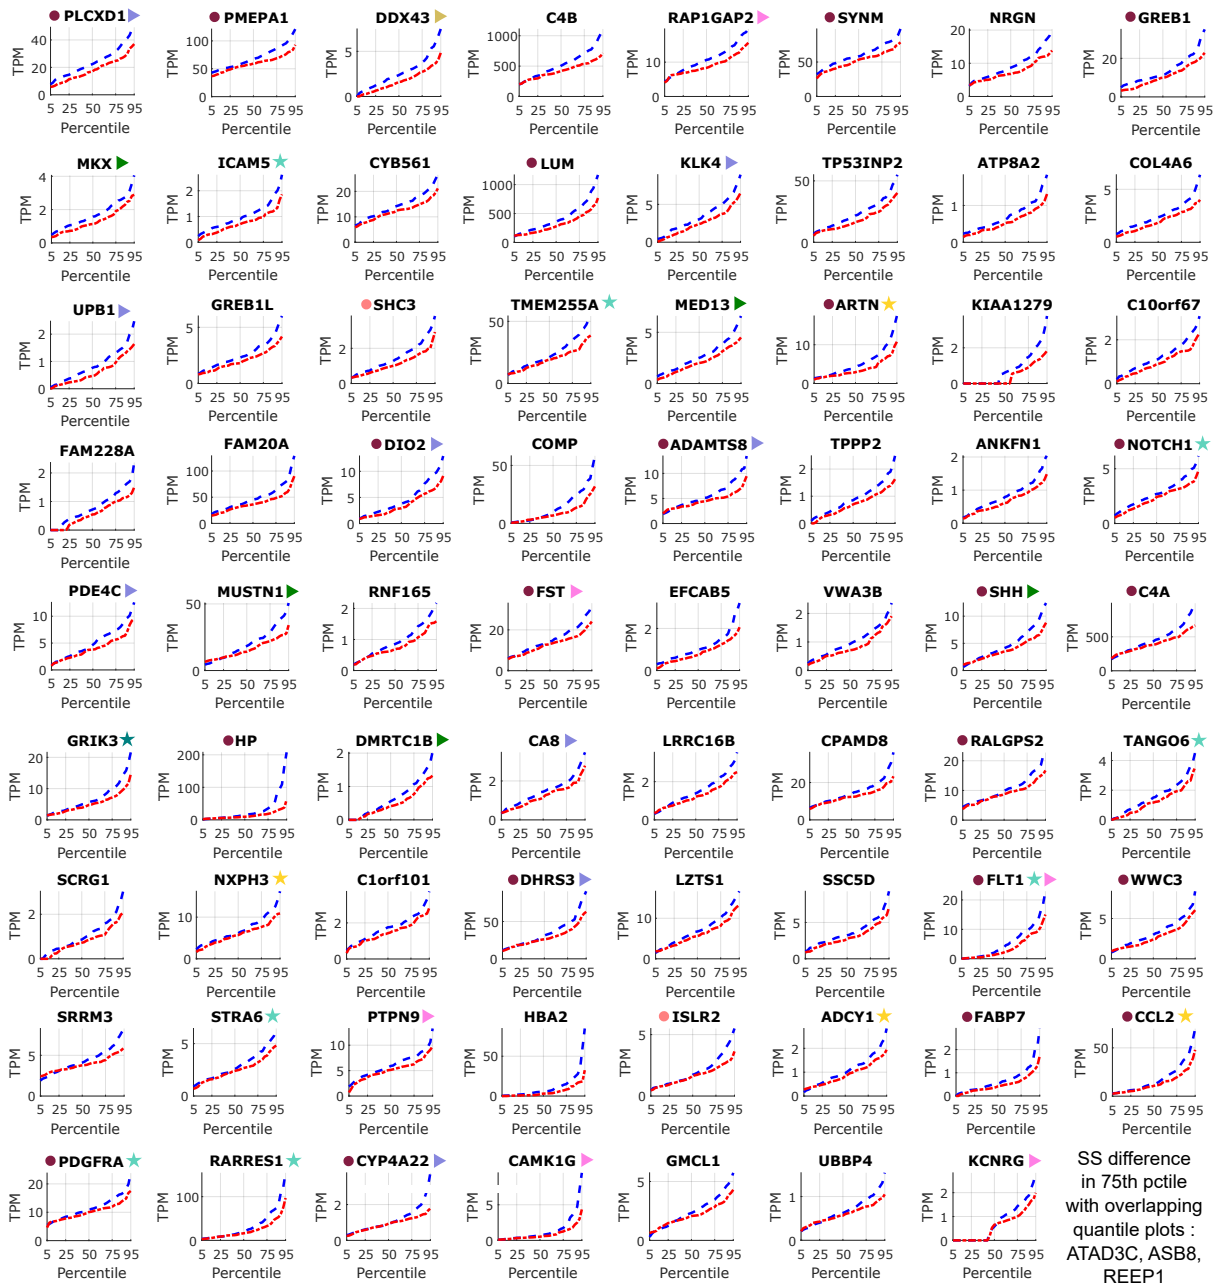

SS difference in 75th ptile with overlapping quantile plots : ATAD3C, ASB8, REEP1

Supplementary Image S1. Quantile plots for all genes upregulated in male BSL sub-cohort
